1 **Title:** Host phylogeny and host ecology structure the mammalian gut microbiota at  
2 different taxonomic scales

3  
4 **Running title:** Gut microbiota of mammalian herbivores

5  
6 **Author names:** Connie A. Rojas<sup>1,2,3</sup>, Santiago A. Ramírez-Barahona<sup>4</sup>, Kay E. Holekamp<sup>1,2,3</sup>,  
7 Kevin R. Theis<sup>3,5</sup>

8  
9 <sup>1</sup>Department of Integrative Biology, Michigan State University, Lansing, MI, USA

10 <sup>1</sup>Ecology, Evolution and Behavior Program, Michigan State University, Lansing, MI, USA

11 <sup>3</sup>BEACON Center for the Study of Evolution in Action, Michigan State University, Lansing,  
12 MI, USA

13 <sup>4</sup>Departament of Botany, Institute of Biology, Universidad Nacional Autónoma de México,  
14 Mexico City, MX

15 <sup>5</sup>Department of Biochemistry, Microbiology and Immunology, Wayne State University,  
16 Detroit, MI, USA

17  
18 **Name and email address of all authors:**

19 Connie Rojas, [rojascon@msu.edu](mailto:rojascon@msu.edu) (Corresponding author)

20 Santiago A. Ramírez-Barahona, [santiago.ramirez@ib.unam.mx](mailto:santiago.ramirez@ib.unam.mx)

21 Kay E. Holekamp, [holekamp@msu.edu](mailto:holekamp@msu.edu)

22 Kevin R. Theis, [ktheis@med.wayne.edu](mailto:ktheis@med.wayne.edu)

23  
24 **Keywords (3-10):** herbivore gut microbiota, African mammals, phyllosymbiosis, diet, 16S  
25 rRNA gene sequencing, gut microbiome

26  
27 **word count for the abstract (max 350 words):** 221

28 **combined number of main tables and figures:** 7

29 **References:** 97

30  
31  
32  
33  
34  
35  
36  
37  
38  
39  
40  
41  
42  
43

## 44 **Abstract**

45 The gut microbiota is critical for host function. Among mammals, host phylogenetic  
46 relatedness and diet are strong drivers of gut microbiota structure, but one factor may be  
47 more influential than the other. Here, we used 16S rRNA gene sequencing to determine the  
48 relative contributions of host phylogeny and host dietary guild in structuring the gut  
49 microbiotas of 11 herbivore species from 5 families living sympatrically in southwest  
50 Kenya. Herbivore species were classified as grazers, browsers, or mixed-feeders. We found  
51 that gut microbiotas were highly species-specific, and that host family accounted for more  
52 variation in the gut microbiota (35%) than did host dietary guild (14%). Overall, similarity  
53 among gut microbiotas increased with host phylogenetic relatedness ( $r=0.73$ ), yet this  
54 relationship was not apparent among seven closely related Bovid host species ( $r=0.21$  NS).  
55 In bovids, host dietary guild explained twice as much variation in the gut microbiota as did  
56 host species. Lastly, we found that the gut microbiotas of herbivores residing in southwest  
57 Kenya closely resemble those of conspecifics from central Kenya, suggesting that  
58 regardless of variability in host local habitat, hosts consistently provide microbes with  
59 similar niches for colonization. Overall, our findings suggest that host phylogeny may  
60 structure the gut microbiota at broad taxonomic scales, but that host ecology may be more  
61 influential in shaping the gut microbiotas of closely related host species.

## 62 **Background**

64 The mammalian gastrointestinal tract harbors dense populations of microbes, which  
65 collectively are termed the gut microbiota. Resident gut microbes are known to promote  
66 the digestive efficiency of their hosts by synthesizing vitamins, breaking down fiber, and  
67 supplementing the host with energy released from fermentation [1–4]. The gut microbiota  
68 also interacts with the host immune system, and may also modulate behavior [5–7]. Due to  
69 the critical importance of the gut microbiota for mammalian gastrointestinal functioning,  
70 recent research has focused on identifying factors that influence the composition,  
71 structure, and assembly of these bacterial communities. Across a wide range of studies  
72 conducted with both captive and wild mammal populations, physiological factors such as  
73 host sex, age, and disease state can explain variation in the gut microbiota [8–11].  
74 Additionally, a range of environmental factors including host habitat, season, and  
75 geography are also associated with gut microbiota structure [12–15]. However, the two  
76 main drivers of mammalian gut microbiota composition are consistently host diet and host  
77 phylogenetic relatedness.

78  
79 Across large taxonomic scales, the mammalian gut microbiota varies with host diet,  
80 such that omnivores, carnivores, and herbivores exhibit distinct gut microbiota profiles  
81 [16–18]. Furthermore, changes in host diet are usually accompanied by changes in the gut  
82 microbiota. For instance, in Western lowland gorillas (*Gorilla gorilla gorilla*), the gut  
83 microbiota shifts during drier periods of the year, when gorillas transition from eating  
84 fruits to eating more herbs and leaves [19]. More fine-scale differences in diet are also  
85 associated with variation in the gut microbiota. In giant pandas (*Ailuropoda melanoleuca*),  
86 consumption of different bamboo parts (shoot vs. stem vs. leaf) or different bamboo  
87 species is correlated with different gut microbiota compositions [20, 21]. Nonetheless, the  
88 gut microbiota is also structured by host phylogenetic relatedness, such that closely related  
89 host species often have more similar gut microbiotas than more distantly related host

90 species [22–26]. This congruence between host phylogenetic relatedness and gut  
91 microbiota similarity is termed “phylosymbiosis” [27–29]. Phylosymbiosis can arise when  
92 closely related host species provide potential colonizing microbes with similar ecological  
93 niches, which may or may not be due to host overlap in diet, habitat, physiology, and/or  
94 behavior.

95  
96 If phylogenetic relatedness is a more important predictor of the gut microbiota than  
97 host ecology, then gut microbiota similarity should increase with increasing phylogenetic  
98 relatedness among hosts regardless of their habitat or dietary preferences. Phylosymbiosis  
99 should be evident among hosts that share habitats or diets, as well as among hosts that  
100 reside in different habitats and consume different diets. For example, in mice, voles, and  
101 shrews, gut microbiotas tend to be more similar among closely related host species, despite  
102 these animals occupying different habitats [30]. In populations of American pikas  
103 (*Ochotona princeps*) from different mountain ranges, a cladogram of gut microbiota  
104 similarity was congruent with a phylogeny of host genetic similarity [31]. Within folivorous  
105 primates that had overlapping diets, gut communities exhibited patterns consistent with  
106 phylosymbiosis [23]. Furthermore, phylosymbiosis has been observed among host species  
107 that live sympatrically. Recently, Kartzinel *et al.* analyzed the gut microbiotas of 33 species  
108 of sympatric herbivores from the Laikipia region in central Kenya, across multiple seasons  
109 and found that host phylogenetic relatedness strongly predicted gut microbiota  
110 composition ( $r = 0.91$ ). Host phylogenetic relatedness was only weakly correlated with  
111 host diet ( $r = 0.28$ ) [32], suggesting that convergence of gut microbiotas among closely  
112 related hosts was not due to shared host ecology or diet, but potentially to shared  
113 evolutionary history among hosts, which could include similar evolutionary histories and  
114 relationships between the hosts and their resident microbiota.

115  
116 Here, we build upon this earlier work and use 16S rRNA gene sequencing to  
117 determine the relative influences of host phylogenetic relatedness and host diet in  
118 structuring the gut microbiota of 11 species of herbivores living sympatrically in the Masai  
119 Mara National Reserve (henceforth the Masai Mara) in southwestern Kenya. We survey the  
120 gut microbiotas of African buffalo, domestic cattle, Common eland, impala, Kirk’s dik-dik,  
121 Thompson’s gazelle, topi, Masai giraffe, common warthog, plains zebra, and African  
122 elephant. These species represent 5 mammalian families (Bovidae, Elephantidae, Equidae,  
123 Giraffidae, and Suidae) and three dietary guilds: grazers, browsers, and mixed-feeders. We  
124 determine whether patterns observed among Laikipia herbivores [32] are also observed  
125 among herbivores in the Masai Mara. We also compare the gut microbiotas of herbivores  
126 from the two geographic regions to determine the extent to which host geography and/or  
127 local habitat influence the gut microbiota, as these two regions differ in their altitude,  
128 vegetation, mammal species and densities, and degree of human disturbance [33–37]. The  
129 two regions are about ~ 290 km apart.

130  
131 Specifically, our study objectives were to 1) characterize the gut microbiota  
132 composition of 11 species of Masai Mara herbivores, 2) determine the relative  
133 contributions and amount of variance in the gut microbiota explained by host family and  
134 host species compared to host dietary guild, 3) determine whether phylosymbiosis was  
135 observed among our 11 study species, and in a reduced sample of 7 closely related Bovid

136 species, and 4) compare the gut microbiotas of Masai Mara herbivores to those from  
137 conspecifics in Laikipia to evaluate whether phyllosymbiosis is observed despite hosts  
138 occupying different geographic regions and different habitat types. Collectively, our  
139 findings elucidate the factors shaping the gut microbiota of hosts at greater and lesser  
140 taxonomic scales, which has implications for host gastrointestinal functioning.

141

## 142 **Results**

### 143 ***Gut microbiota composition in 11 species of African herbivores.***

144 The gut microbiotas of the surveyed savanna herbivores (Table 1) were dominated by two  
145 bacterial phyla, *Firmicutes* (51% average relative abundance across samples), and  
146 *Bacteroidetes* (32% average relative abundance), and also contained significant  
147 proportions of *Spirochaetes* (3%), *Verrumicrobia* (3%), *Proteobacteria* (2.4%), and  
148 *Tenericutes* (1.8%) (Figure S2). The most abundant bacterial families across host species  
149 were *Ruminococcaceae* (30.8% average relative abundance), *Rikenellaceae* (11.4%),  
150 *Lachnospiraceae* (10.9%), and *Prevotellaceae* (8%). The gut microbiotas also contained  
151 unclassified *Bacteroidales* (3.9%), and bacteria from the *Bacteroidaceae* (3.7%),  
152 *Spirochaetaceae* (3.7%), *Akkermansiaceae* (2.9%), and *Christensenellaceae* (2.8%) families  
153 (Figure 1A). Prevalent bacterial genera included *Alistipes*, *Bacteroides*, *Ruminococcus*, and  
154 *Treponema* (Figure S3).

155

156 A total of 10 Amplicon Sequence Variants (ASVs) were present in >90% of the  
157 samples and represented core bacterial taxa; 7 were assigned to the family  
158 *Ruminococcaceae*, 1 to *Peptococcaceae*, and 2 to *Lachnospiraceae* (*Agathobacter*).  
159 Differences in gut microbiota composition between host species were also evident (Figure  
160 1A). The gut microbiota of each host species contained ASVs that were widespread (i.e.  
161 present in >75% samples) among that host species' samples yet were rarely present (i.e.  
162 present in <3% samples) elsewhere; we refer to these ASVs as being unique to a particular  
163 host species. Buffalo, cattle, topi, and impala gut microbiotas were mostly comprised of  
164 ASVs that were present in other herbivores, as <2% of their ASVs were unique to each host  
165 species. Between 4% and 8% of ASVs comprising the gut microbiota of dik-diks, eland,  
166 elephant, Thompson's gazelle, and giraffe were unique to each particular host species.  
167 Warthogs and zebras however, harbored distinct microbiotas, as 70-77% of their ASVs  
168 were not present in the guts of the other African mammals.

169

### 170 ***Gut microbiota alpha-diversity varies with host family and dietary guild.***

171 Across our surveyed host taxa, gut microbiota richness, evenness, and phylogenetic  
172 diversity varied with host family and dietary guild, but not with rainfall or average  
173 maximum temperature over the prior two weeks of sampling (Table 2, Figure 2A). The  
174 average minimum temperature over the prior two weeks was significantly associated with  
175 gut microbiota phylogenetic diversity but not with richness or evenness (Table 2).  
176 Specifically, lower minimum temperatures were associated with lower gut microbiota  
177 phylogenetic diversity. Surprisingly, host fermentation type explained none of the observed  
178 variation in the  $\alpha$ -diversity of gut microbiotas (Table 2).

179

180 Post-hoc comparisons revealed that hosts from the Bovid and Equid families tended  
181 to have richer gut bacterial communities than the other surveyed savanna herbivores,

182 whereas hosts from the Suidae and Elephantidae families generally harbored less diverse  
183 gut communities (Figure 2A; see Table S1 for exact post-hoc comparison values).  
184 Furthermore, grazers tended to have more diverse gut microbiotas than browsers (Linear  
185 Mixed Model (LMM) Chao 1  $\beta=359.2 \pm 125.5$   $p<0.01$ , Shannon diversity  $\beta=0.36 \pm 0.17$   
186  $p<0.01$ , Phylogenetic diversity  $\beta=-4.54 \pm 3.12$   $p=0.19$ ) or mixed-feeders (LMM Chao 1  $\beta=-$   
187  $466 \pm 138.4$   $p<0.001$ , Shannon diversity  $\beta=0.59 \pm 0.19$   $p<0.01$ , Phylogenetic diversity  $\beta=-$   
188  $4.45 \pm 3.44$   $p=0.19$ ). The gut microbiota of mixed-feeders was more phylogenetically diverse  
189 than that of browsers (LMM Phylogenetic diversity  $\beta=-9 \pm 3.38$   $p=0.023$ ), but the two  
190 groups harbored communities of similar richness and evenness (LMM Chao 1  $\beta=-106.8$   
191  $\pm 135.7$ , Shannon diversity  $\beta=0.22 \pm 0.18$ ; all  $p>0.05$ ) (Figure 2A).

192  
193 Lastly, within a single host family (i.e. Bovidae), microbiota alpha-diversity varied  
194 with host species, dietary guild, and average minimum temperatures over two weeks  
195 (Figure 2C, Table 2). Specifically, greater higher minimum temperatures during the prior  
196 two weeks were associated with reduced gut microbiota diversity. Post-hoc comparisons  
197 revealed that, generally, cattle and impala harbored more diverse microbiotas than did  
198 buffalo or dik-diks (see Table S2 for exact post-hoc comparison values). Additionally, the  
199 gut microbiotas of browsers were less diverse than those of grazers (LMM Chao 1  $\beta=-511.4$   
200  $\pm 115.1$   $p<0.0001$ ; Shannon diversity  $\beta=-0.77 \pm 0.15$   $p<0.0001$ ; Phylogenetic diversity  $\beta=-$   
201  $8.81 \pm 3.02$   $p=0.01$ ) or mixed-feeders (LMM Chao 1  $\beta=-296.8 \pm 126.0$   $p=0.02$ ; Shannon  
202 diversity  $\beta=-0.64 \pm 0.16$   $p<0.0001$ ; Phylogenetic diversity  $\beta=-5.33 \pm 3.12$   $p=0.13$ ) (Figure  
203 2C). Gut microbiota diversity did not differ between grazers and mixed feeders (Chao 1  
204  $\beta=214.7 \pm 133.4$ , Shannon diversity  $\beta=-0.13 \pm 0.17$ ; Phylogenetic diversity  $\beta=-3.48 \pm 3.26$   
205  $p=0.023$ ; all  $p>0.05$ ).

206  
207 ***Host taxonomy outweigh host dietary guild in structuring the gut microbiota.***  
208 The strongest predictors of gut microbiota structure across the 11 species of African  
209 herbivores were host family, followed by host dietary guild, and host species. These factors  
210 explained, on average, 24.74%, 13.54%, and 10.42% of the variation in the gut microbiota,  
211 respectively (Permutational Multivariate Analysis of Variance (PERMANOVA) analyses,  
212 Table 3). Sample month explained only 1.5% of the variation, and rainfall and temperature  
213 values during the prior two weeks were not predictive of gut microbiota composition  
214 (Table 3). Regardless of whether distance matrices took into account the proportions of  
215 bacterial taxa, their presence/absence, or their phylogenetic relatedness, the percent  
216 variation explained by each host factor was consistent. Thus, we only present PCoA  
217 ordination plots using the Bray-Curtis index for brevity. These plots show that the gut  
218 microbiota primarily partitions by host family, and within a family, the gut microbiota  
219 secondarily groups by host dietary guild (Figure 2B).

220  
221 Within Bovidae, host dietary guild was a slightly stronger predictor of the gut  
222 microbiota (21.12% of the variation) than host species (17.19% of the variation) (Bray-  
223 Curtis, PERMANOVA) (Figure 2D) (Table 3). When taking into account the phylogenetic  
224 diversity of bacterial taxa in the gut microbiota (weighted Unifrac metric, PERMANOVA),  
225 host dietary guild explained twice the amount of variation (21.74%) as that accounted for  
226 by host species (10.47%) (Table 3). PCoA ordinations showed that the gut microbiotas of  
227 each dietary guild formed distinct clusters, but were also differentiated by host species

228 (Figure 2D). Indeed, when controlling for host dietary guild, the microbiota is highly-  
229 species specific and host species accounts for 49% of the observed variation  
230 (PERMANOVA: Bray-Curtis  $R^2=0.48$ ; Jaccard  $R^2=0.44$ ; Weighted Unifrac  $R^2=0.49$ ,  
231 Unweighted Unifrac  $R^2=0.47$ ; all  $p=0.001$ ) (Figure S4).

232

### 233 ***Bacterial taxa are enriched in particular herbivore hosts.***

234 Indicator species analysis showed that the gut microbiotas of elephants maintained higher  
235 proportions of *Endomicrobiaceae* and *Desulfobulbaceae*, Zebras of *Helicobacteraceae* and  
236 *Deltaproteobacteria*, and warthogs of *Myxococcales* and *Coxiellaceae*. Giraffe gut  
237 microbiotas were enriched in *Enterobacteriaceae*, *Bifidobacteriaceae*, and *Bacillaceae*  
238 (Figure 1B).

239

240 Similarly, the gut microbiotas of hosts from different dietary guilds were enriched in  
241 specific types of bacteria. Grazer gut microbiotas contained greater abundances of  
242 *Sphingobacteriaceae*, *Flavobacteriaceae*, *Neisseriaceae*, and *Lentisphaeria* (Figure 1C) than  
243 those of browsers or mixed feeders. Browser gut microbiotas were enriched in 11 bacterial  
244 taxa, including *Bacillaceae*, *Coriobacteriales*, *Methanomicrobia* and *Rubrobacteriaceae*  
245 (Figure 1C). Lastly, the gut microbiotas of mixed feeders harbored high proportions of  
246 *Synergistaceae*, *Succinivibrionaceae*, and *Bacteroidales*, among other bacteria (Figure 1C).

247

### 248 ***Evidence of phylosymbiosis in the gut microbiotas of African herbivores.***

249 Our results indicate that gut microbiota similarity increased with host phylogenetic  
250 relatedness (mantel test Bray-Curtis  $r=0.76$ ,  $p=0.006$ ; Jaccard  $r=0.72$ ,  $p=0.006$ ; Weighted  
251 Unifrac  $r=0.75$ ,  $p=0.007$ ; Unweighted Unifrac  $r=0.72$ ,  $p=0.007$ ). The gut microbiota tended  
252 to be more similar among closely related host taxa (e.g. buffalo and cattle) than among  
253 distantly related host taxa (e.g. impala and elephant) (Figure 3A & Figure 3B). Despite  
254 warthogs being more closely related to bovids than to elephants and zebras (Figure 3A),  
255 they had highly dissimilar communities from all of the herbivore species examined, and  
256 pairwise comparisons that include this host species deviate from the trendline (Figure 3B).  
257 Importantly, among closely related species in the Bovid family, we found no significant  
258 relationship between host phylogenetic relatedness and gut microbiota similarity (mantel  
259 test Bray-Curtis  $r=0.27$ ,  $p=0.09$ ; Jaccard  $r=0.20$ ,  $p=0.08$ ; Weighted Unifrac  $r=0.22$ ,  $p=0.059$ ;  
260 Unweighted Unifrac  $r=0.16$ ,  $p=0.08$ ).

261

### 262 ***Host geographic region does not strongly predict the gut microbiotas of Masai Mara 263 and Laikipia herbivores.***

264 We compared the gut microbiota structure of eight herbivore species (African buffalo,  
265 domestic cattle, common eland, impala, giraffe, plains zebra, common warthog, and African  
266 elephant) inhabiting the Masai Mara (this study) and the Laikipia region (Kartzinel *et al.*  
267 [32]) in Kenya. We found that host geographic region explained little of the observed  
268 variation in the gut microbiota (<2%, with the exception of weighted Unifrac distances,  
269 where it explained 6%) (Table S3). The gut microbiotas were primarily structured by host  
270 species and host dietary guild, which explained on average, 39% and 12% of the variation,  
271 respectively (Figure 4A, Table S3). Sample month explained an additional 2-3% of the  
272 variation (Table S3).

273

274 When examining each host species separately, host geographic region weakly  
275 predicted gut microbiota structure (Table S3). Here, variation in sample month was more  
276 strongly associated with variation in the gut microbiota (accounting for up to 7% of the  
277 variation) than was host geographic region (which accounted for 1-6% of the variation).  
278 Furthermore, within each host dietary guild, the gut microbiota clustered closely by host  
279 species and this factor explained >50% of the observed variation, despite hosts residing in  
280 two geographic regions (Table S3). Lastly, patterns consistent with phylosymbiosis were  
281 also observed in herbivores from both geographic regions in Kenya. Gut microbiota  
282 similarity increased with host phylogenetic relatedness (mantel test Bray-Curtis  $r=0.67$ ,  
283  $p=0.016$ ; Jaccard  $r=0.76$ ,  $p=0.005$ ; Weighted Unifrac  $r=0.62$ ,  $p=0.011$ ; Unweighted Unifrac  
284  $r=0.68$ ,  $p=0.027$ ). Similar to what was observed earlier in our Masa Mara study animals,  
285 phylosymbiosis was not evident among the four species of bovids included in both studies  
286 (mantel test Bray-Curtis  $r=0.92$ ,  $p=0.08$ ; Jaccard  $r=0.92$ ,  $p=0.08$ ; Weighted Unifrac  $r=0.83$ ,  
287  $p=0.16$ ; Unweighted Unifrac  $r=0.92$ ,  $p=0.08$ ).  
288

289 When comparing gut microbiota compositions between the herbivores of the two  
290 regions, we found that each species of herbivore contains similar relative abundances of  
291 the predominant bacterial ASVs as those found in their conspecifics in the other region  
292 (Figure 4B). Only elephant and warthog gut microbiotas appear to differ between hosts in  
293 the Masai Mara and Laikipia regions.  
294

## 295 Discussion

### 296 *Evidence of phylosymbiosis in sympatric African herbivores.*

297 Our results showed that phylosymbiosis was observed among 11 species of herbivores  
298 living sympatrically in the Masai Mara . Patterns of phylosymbiosis have been documented  
299 extensively across vertebrate groups, including primates, rodents, ruminants, carnivores,  
300 reptiles, and insects [23–26, 32, 38, 39]. However, in many of these studies, host species do  
301 not occur sympatrically, and usually inhabit multiple habitats across the globe.  
302 Nonetheless, in addition to findings documented for herbivores in the Laikipia and Masai  
303 Mara regions of Kenya, evidence of phylosymbiosis among host species living in sympatry  
304 has been observed in seven species of deer mice [40], six species of Malagasy mammals  
305 [41], twelve species of lemurs [42], and nine species of diurnal, non-human primates [43].  
306

307 The mechanisms and processes that yield patterns of phylosymbiosis have not yet  
308 been elucidated, but host ecological and phenotypic traits are likely acting as filters and  
309 thus shaping microbial community assembly. Closely related hosts are potentially  
310 facilitating colonization by the same microbial types, due to similarities in their  
311 morphology, anatomy, digestive physiologies, and immune system components [16, 44,  
312 45]. Specifically, related hosts may possess similar antimicrobial peptides and toll-like  
313 receptors that serve to filter similar bacterial clades from the environment [46, 47]. Closely  
314 related hosts may further develop immune tolerance via adaptive immunity to the same  
315 symbiotic, commensal, and transient microbes [46, 47]. Lastly, some phylogenetically  
316 related hosts may also possess similar social group structures and pathways for  
317 transmitting microbes among group-mates, thereby contributing to patterns of  
318 phylosymbiosis. Overall, accumulation of differences in host traits as hosts diverged from

319 one another could potentially provide enough habitat differentiation in the gut to promote  
320 the divergence of symbiotic bacterial communities.

321  
322 Furthermore, we found that phylosymbiosis was also present in conspecific African  
323 herbivores living in allopatry, in the Masai Mara or Laikipia regions of Kenya, although the  
324 strength of the phylosymbiotic signal was slightly reduced compared to that observed for  
325 either sympatric population considered in isolation. Overlap in gut microbiota structure is  
326 thought to be lower in allopatric animal populations than in sympatric animals due to  
327 variation introduced by habitat, dietary differences, and the spatial limits of bacterial  
328 dispersal [26], which could lead to slight differences in gut microbiota compositions among  
329 conspecifics inhabiting different geographical areas.

330  
331 ***Host taxonomy outweighs influences of host ecology in structuring the gut microbiota***  
332 ***across herbivore species.***

333 Across the surveyed herbivores, host family and species were the strongest predictors of  
334 gut microbiota structure followed by host dietary guild. Gut microbiota clustering by host  
335 species is widespread, and is commonly reported in the majority of comparative gut  
336 microbiome studies. Host species may vary in their body size, behavior, neuroendocrine  
337 system, immune system, and metabolism, any of which could potentially shape the  
338 compositions of their gut microbiotas [16, 45, 48, 49].

339  
340 Additionally, our study found that conspecific hosts from different geographic  
341 regions (Masai Mara, Kenya vs. Laikipia, Kenya) did not necessarily possess different gut  
342 microbiotas. Despite differences between the two regions in their climate, soil  
343 geochemistry, plant communities, and resident herbivore species, and potentially in their  
344 bacterial species pools, hosts are being colonized by the same bacterial types. The gut  
345 microbiotas of herbivores from Laikipia and the Masai Mara were inhabited by bacteria  
346 that, not only were likely performing very similar metabolic functions, but were the same  
347 sequence variants. Hosts from the two geographic regions are evidently filtering the same  
348 bacterial clades from the environment and are providing microbes with similar niches for  
349 colonization, leading to similar gut microbiota profiles. These findings suggest that there is  
350 strong selection for hosts to associate with particular microbial symbionts and for  
351 microbes to associate with particular animal hosts [47, 50]. Hosts have evolved  
352 sophisticated adaptations to live in symbiosis with a dense and diverse gut microbiota and  
353 bacteria have also evolved adaptations to reside in their host's body niches [47, 50]. In  
354 many vertebrates, microbes have enabled their hosts to adapt to changes in their  
355 environment and access new food resources, niches, or metabolites, thereby fostering close  
356 associations between hosts and their gut microbes [50, 51].

357  
358 ***Within a host family, among closely related hosts, host ecology is a stronger predictor***  
359 ***of the gut microbiota than across host families.***

360 Within a group of closely related Bovid species in the Masai Mara, variation in the gut  
361 microbiota was more strongly associated with host ecology than host phylogeny. Gut  
362 microbiota similarity did not increase with host phylogenetic relatedness in bovinds, and  
363 host dietary guild explained twice as much variation as did host species in the bovid data  
364 set. In other words, here between-species variation was less than the variation introduced



365 by differing diets. Additionally, gut microbiota alpha-diversity varied with environmental  
366 variables like minimum temperature during the two weeks before sampling, when this  
367 variable was not significant in the overall dataset.

368  
369 Similarly, other studies report that local habitat, and not phylogenetic relatedness,  
370 predicts the structure of the gut microbiota among closely related hosts. For example, in  
371 lemurs (*Eulemur* spp., *Propithecus* spp.), phyllosymbiosis was observed across but not  
372 within two host lineages, and within host lineages, host habitat (dry forest vs. rainforest)  
373 was significantly correlated with gut microbiota diversity [42]. In six species of chipmunk  
374 (*Tamias* spp.), gut microbiotas primarily clustered by host geography rather than by host  
375 species [52]. Lastly, in populations of yellow (*Papio cynecephalus*) and anubis baboons  
376 (*Papio anubis*), gut microbiota dissimilarity did not increase with host genetic distance, but  
377 did vary with their habitat's soil chemistry [53]. Because the bovids surveyed here are  
378 closely related, their bacterial communities are already very similar, and variation in their  
379 gut microbiotas likely result from fine-scale differences in diet, and variation in the local  
380 environment. While all the bovids are herbivores and ruminants, they do consume different  
381 plant parts (grass vs. shrubs vs. trees) [17, 54–56], and the gut microbiota can reflect these  
382 differences [20, 21]. Lastly, the gut microbiota is dynamic and highly responsive to changes  
383 in its hosts internal and external environment, which is why gut microbiota variation was  
384 correlated with rainfall and temperature in bovid hosts.

### 385 386 ***High gut microbiota alpha-diversity in grazing herbivores.***

387 Results showed that gut microbiota alpha-diversity was considerably higher in grazers  
388 than in browsers or mixed-feeders. While mixed-feeders, including the omnivorous  
389 warthog, may have greater dietary breadths than grazers or browsers, they did not have  
390 more diverse gut communities. This is in accordance with prior findings, which report that  
391 the most diverse host diets do not always correlate with the most diverse microbiotas [32,  
392 57, 58]. However, group size has been shown to correlate with gut microbiota diversity [59,  
393 60], and the grazers in our study (e.g. buffalo, topi, zebras) forage in large herds, compared  
394 to the two browser species (giraffes, dik-diks) or some of the mixed-feeders (e.g.  
395 warthogs), which live in smaller groups. Frequent social interactions and interactions with  
396 a greater number of individuals is known to promote species richness in individual gut  
397 microbiotas [60, 61].

398  
399 Additionally, when comparing the diversity of gut microbiotas among host families,  
400 bovids and equids harbored more diverse gut communities than hosts from *Suidae* or  
401 *Elephantidae*. Zebras in particular may have high alpha diversity because they consume the  
402 tops of grasses, which are lower in quality and contain a higher proportion of cellulose and  
403 lignin compared to young shoots, which is the preferred food source for some of the Bovid  
404 hosts [62]. Digestion of this tough plant material may require the enzymes and  
405 metabolisms from a diversity of bacterial types.

### 406 407 ***Gut microbiota composition reflects host dietary requirements in herbivores.***

408 Across our surveyed herbivores, the most abundant bacterial taxa in the gut microbiota  
409 were *Ruminococcaceae*, *Rikenellaceae*, *Lachnospiraceae*, and *Prevotellaceae* which  
410 represent core taxa previously found in the gut microbiotas of many ruminants and

411 herbivores in general, including cervids and bovids [22, 63], equids [64], elephants[65],  
412 and giraffes[66]. *Ruminococcaceae* and *Lachnospiraceae* have also been found in the guts of  
413 folivorous primates [3] and in domestic pigs [67, 68]. Members of these bacterial families  
414 are responsible for digesting the cellulose, hemicellulose, lignin, and protein found in  
415 leaves, bark and grass, and fermenting these into short-chain fatty acids (SCFAs) such as  
416 acetate, succinate, butyrate, propionate [69] . These SCFAs are usable forms of energy for  
417 their hosts [70] and they can further contribute to host colonocyte growth, immune  
418 defense, and anti-inflammatory responses [1]. These bacterial taxa also possess fiber-  
419 degrading capabilities and can provide their hosts with protection against ingested toxic  
420 plant secondary metabolites [71].

421  
422 Not all bacteria in the gut are directly contributing to their host's physiology; some  
423 may be commensals that cross-feed with keystone bacteria [72], while others may protect  
424 their hosts from pathogens through competitive exclusion or the synthesis of antimicrobial  
425 peptides [73, 74]. From an evolutionary perspective, it can be advantageous for hosts to  
426 harbor complex gut communities so that they can respond to novel environmental  
427 conditions and recover from disturbances (e.g. antibiotics or infection).

## 428 429 **Conclusions**

430 Our study showed that phylosymbiosis was observed in 11 species of sympatric herbivores  
431 residing in the Masai Mara, Kenya. Additionally, we found that the gut microbiota exhibited  
432 high species-specificity. The gut microbiotas of eight species of herbivores residing in two  
433 geographic areas in Kenya (Masai Mara and Laikipia) were very similar between  
434 conspecifics, and contained the same bacterial types. Overall, these findings suggest strong  
435 associations between herbivore hosts and their gut microbes, as well as the likelihood that  
436 related hosts are providing microbes with similar niches for colonization. Future studies  
437 should examine whether phylosymbiosis is present in the gut metagenomes of African  
438 herbivore species, and whether archaeal or fungal communities vary with host species and  
439 are related to host phylogeny.

## 440 441 **Methods**

### 442 ***Study location and sampling.***

443 Fecal samples (N=181) were collected opportunistically from 11 species of herbivores  
444 permanently residing in the Talek and Mara Triangle regions of the Masai Mara  
445 (1°22'19"S, 34° 56'17"E) from March-June 2018 (Table 1). This Reserve is covered by  
446 open rolling grassland interspersed with seasonal watercourses and riparian bushes and  
447 trees. It has two rainy seasons (March-May and November-December, with annual rainfall  
448 >1000mm), and most of our sampling took place during the rainy months. Although the  
449 Masai Mara is home to small resident populations of zebra and wildebeest, millions of these  
450 individuals migrate into the reserve from July-October every year. As sampling occurred  
451 here before July, samples from wildebeest and zebras were limited. This is in contrast to  
452 Laikipia, which is more arid, and rainfall is "trimodal", averaging 300-600 mm annually [34,  
453 36]. Elephant, impala and dik-dik are the dominant large herbivores in this region [75].

454  
455 For fecal sample collection, we either observed animals defecating or identified  
456 species-of-origin based on the size, shape, and consistency of fresh dung, following

457 Kartzinel *et al.* (2019). Samples were then placed in sterile cryogenic vials and stored in  
458 liquid nitrogen until they were transported to Michigan State University, where they  
459 remained frozen at -80°C until nucleic acid extraction. For a list of all samples and their  
460 associated metadata, see the Github repository for this project  
461 (<https://github.com/rojascon/Rojas et al 2020 African herbivores gut microbiome>).

462

463 While we did not directly collect diet data from the surveyed herbivores, we used  
464 Kingdon's *East African Mammals* [76–79] to classify our study species into their respective  
465 dietary guilds. Information about animal's fermentation type (e.g. foregut vs hindgut) was  
466 obtained from previously published sources [17, 54–56].

467

#### 468 **DNA extraction and 16S rRNA gene sequencing.**

469 Fecal samples were sent to the University of Chicago at Illinois (UIC) Sequencing Core for  
470 automated DNA extractions using QIAGEN DNeasy PowerSoil kits (Valencia, CA, USA). DNA  
471 Concentrations of the fecal sample extracts were quantified using Qubit. The V4 region of  
472 the 16S rRNA gene was targeted for sequencing on the Illumina MiSeq platform at the  
473 Michigan State University Genomics Core, using published protocols by Caporaso *et al.*  
474 2012 [80] and Kozich *et al.* 2013 [81].

475

#### 476 **Sequence processing and bioinformatics.**

477 Sequences were processed in R (v.3.6.2) [82] using the Divisive Amplicon Denoising  
478 Algorithm (DADA2) pipeline (v1.14.1) [83] to infer amplicon sequence variants (ASVs).  
479 Briefly, reads were filtered for quality, allowing for 2 and 3 errors per forward and reverse  
480 read, respectively (trimLeft = c(10, 10), maxN = 0, maxEE = 2, truncQ = 2). Forward reads  
481 were trimmed to 240bp and reverse reads to 200bp; these paired-end reads were merged.  
482 Sequences were then dereplicated to remove redundancy and ASVs were inferred by  
483 pooling reads from all samples. Prior to creating the ASV abundance table, chimeras were  
484 removed and ASVs were taxonomically classified using the SILVA rRNA gene reference  
485 database (v.132) [84] with an 80% confidence threshold. ASVs taxonomically assigned as  
486 Eukarya, Chloroplasts, or Mitochondria, were removed from the dataset, as were those of  
487 unknown Kingdom origin; 12,938 total ASVs remained. The resulting ASV table and the  
488 taxonomic designations of the ASVs are available on GitHub. On average, samples retained  
489 over 70% ( $\pm$  11%) of their total sequences after processing in DADA2. Nineteen samples  
490 did not amplify well (<400 sequences after processing) and were removed from the  
491 dataset. Most of these samples belonged to browser species (giraffe and dik-dik) suggesting  
492 that there may have been PCR inhibitors in their fecal samples (e.g. humic acid, tannins)  
493 that prevented successful extraction of DNA or library preparation. Table 1 has the sample  
494 sizes (N) for each study species before and after this filtering.

495

#### 496 **Composition and $\alpha$ -diversity statistical analyses.**

497 Statistical analyses and data visualization were completed in R unless otherwise stated. To  
498 visualize microbiota composition, stacked barplots were constructed in ggplot2[85]. These  
499 plots showed the bacterial phyla, families, and genera with average relative abundances  
500 greater than 1% across samples. We also identified core gut microbial taxa, here defined as  
501 ASVs present in >90% of samples across all host species. Furthermore, ASVs were  
502 identified as being unique to a particular host species if they were present in over 75% of

503 the samples from that host species but were also found in <3% of the samples from the  
504 other host species.

505

506 Prior to alpha-diversity analyses, we controlled for potential influences of  
507 sequencing depth by subsampling all samples to 17,000 sequences using the mothur  
508 (v.1.42.3) [86] sub.sample command. Four fecal samples did not meet this sequence cutoff  
509 criterion, and were excluded from all alpha-diversity analyses. Mothur was used to  
510 construct rarefaction curves of ASV richness vs. sequencing depth (Figure S1) and Good's  
511 coverage values averaged  $97.78 \pm 0.91$  across all samples, indicating that sample coverage  
512 was high and appropriate for characterizing fecal microbiota profiles. These values are  
513 comparable to those typically reported for other mammalian gut microbiota studies [21,  
514 22, 87].

515

516 Microbiota alpha-diversity was estimated using observed richness (number of  
517 ASVs), Chao1 Richness, and Shannon diversity calculated using the phyloseq package  
518 (v.1.33.0) [88]. To obtain measures of Faith's Phylogenetic Diversity (PD), we constructed a  
519 phylogenetic tree of ASV sequences using phangorn (v. 2.5.5) [89] and calculated PD using  
520 the picante package (v1.8.1) [90]. The effects of predictor variables on each measure of  
521 alpha-diversity across all samples were evaluated via linear mixed models using the lme4  
522 package (v.1.1.23) [91], specifying host family, dietary guild, fermentation type, and  
523 average rainfall and temperature over two weeks as fixed variables and sample month as a  
524 random variable. A similar model was also built for bovid samples only, and included host  
525 species as a predictor in lieu of host family but excluded fermentation type, as all bovids are  
526 foregut fermenters. The significance of each predictor variable was determined by running  
527 Wald Chi. Sq ANOVA tests ( $\alpha=0.05$ ) on the full models using the car package (v.3.0.7) [92].  
528 These tests were followed by TukeyHSD post-hoc tests with Benjamini-Hochberg  
529 adjustments to control for multiple comparisons.

530

### 531 ***$\beta$ -diversity and phylogenetic statistical analyses.***

532 In order to determine the relative contributions and amount of variance explained by host  
533 predictor variables, permutational multivariate analyses of variance (PERMANOVA) tests  
534 based on Bray-Curtis, Jaccard, and Unifrac distance matrices were run in the R vegan  
535 package [93]. Bray-Curtis/Jaccard distances were estimated using vegan. Weighted and  
536 unweighted Unifrac distances were estimated using phyloseq. Bray-Curtis and weighted  
537 Unifrac distances take into account the abundances of bacterial taxa while Jaccard and  
538 unweighted Unifrac metrics only consider their presence or absence. Both UniFrac metrics  
539 utilize information on the phylogenetic diversity of bacterial members when calculating  
540 microbiota similarity. Microbiota similarity and groupings across samples were visualized  
541 via Principal Coordinates Analysis (PCoA) plots.

542

543 To test for phylosymbiosis, i.e. the congruence between host phylogenetic  
544 relatedness and gut microbiota similarity, mean divergence times (mya) were calculated  
545 between every pair of host species in R. First, we retrieved 1000 phylogenetic trees that  
546 included all species of Artiodactyla and with molecular data African elephants (*Loxodonta*  
547 *Africana*) from Upham's et al. (2019) Mammalian supertree [94]. The trees were randomly  
548 sampled from the posterior distribution of Upham's supertrees (Mammals birth-death tip-

549 dated DNA-only trees) using the VertLife online resource (<http://vertlife.org/>). Each tree  
550 was pruned to include only the species in this study, and branch lengths (i.e. divergence  
551 times between each pair of host species) were extracted using the ape package [95]. All  
552 1000 trees showed the same phylogenetic relationships among the study species. Matrices  
553 of mean divergence times were estimated from the 1000 trees. To determine the strength  
554 of the phyllosymbiosis signal, mantel tests from the vegan package were run on distance  
555 matrices built from the gut microbiota and host divergence time data, using 999  
556 permutations and Spearman correlations. We visualized these results by plotting gut  
557 microbiota similarity (0-1) against host phylogenetic divergence time (mya) in ggplot2. We  
558 also constructed a consensus phylogeny of the host species.

559  
560 Finally, to detect the bacterial taxa most indicative of given host families, bovid  
561 species or dietary guilds, we used the indicpecies package [96], which calculates an  
562 indicator value for each bacterial taxon based on its prevalence in a given group and  
563 absence in others. Significance was assessed by permutation tests using 999 random  
564 permutations. The indicator values of statistically significant bacterial families were plotted  
565 as barplots in ggplot2.

### 566 ***Comparisons of Masai Mara and Laikipia herbivores.***

567 In order to compare the gut microbiotas of Masai Mara (1°22'19"S, 34° 56'17"E)  
568 herbivores to the gut microbiotas of their conspecifics in Laikipia (0°17'33"N, 36°  
569 53'55"E), we concurrently processed the raw 16S rRNA gene sequences from the samples  
570 from this study and those from Kartizinel *et al.* [32] in DADA2. A total of eight herbivore  
571 species overlapped between the two studies: African buffalo, domestic cattle, Common  
572 eland, impala, giraffe, warthog, plains zebra, and African elephant. Samples available for  
573 download from Kartizinel *et al.* [32] and samples from our study were coincidentally both  
574 collected during wet seasons in their respective regions. For a list of all samples (N=305),  
575 and their associated meta data, see the *Availability of data and materials* section.

576  
577  
578 The bioinformatics processing and statistical analyses were performed as described  
579 above, with a few exceptions. In DADA2, forward and reverse reads were trimmed to  
580 240bp and 150bp, respectively. Up to 2 errors were allowed per forward read and up to 4  
581 errors per reverse read. To visualize gut microbiota compositions across species, heatmaps  
582 were constructed using pheatmap (v. 1.0.12) [97], which showed the relative abundances  
583 of the top 30 bacterial ASVs. To identify the strongest predictors of gut microbiota  
584 structure, we constructed three PERMANOVA models. The main model included host  
585 dietary guild, host species, host geographic region, sample month, and sample year as  
586 variables. A second model restricted analyses to within species (strata=species), and a  
587 third model was conducted within dietary guilds (strata=dietary guild). Testing for  
588 phyllosymbiosis was conducted as described above.

### 589 **DECLARATIONS**

#### 591 **Ethical Approval and Consent to participate**

592 Our research and procedures were most recently approved on April 16, 2019 (IACUC  
593 approval no. PROTO201900126) and comply with the ethical standards of Michigan State  
594 University and Kenya.

595  
596  
597  
598  
599  
600  
601  
602  
603  
604  
605  
606  
607  
608  
609  
610  
611  
612  
613  
614  
615  
616  
617  
618  
619  
620  
621  
622  
623  
624  
625  
626  
627  
628  
629  
630  
631  
632  
633  
634  
635  
636  
637  
638  
639  
640

## **Consent for publication**

Not applicable

## **Availability of data and materials**

The 16S rRNA gene sequence data from this study were deposited in NCBI's Sequence Read Archive, under BioProject PRJNA656793 and accession numbers SAMN15803511-SAMN15803691. Sample metadata, data output by DADA2 (ASV table & ASV taxonomic classifications), and R scripts for analyses and figures included in this manuscript are available on Github ([https://github.com/rojascon/Rojas\\_et\\_al\\_2020\\_African\\_herbivores\\_gut\\_microbiome](https://github.com/rojascon/Rojas_et_al_2020_African_herbivores_gut_microbiome)).

## **Competing Interests**

The authors declare that there are no competing interests.

## **Funding**

This work was supported by funds from NSF grants OISE1853934, IOS 1755089, and OIA0939454 to K.E.H. and colleagues, the latter via the BEACON Center for the Study of Evolution in Action. The corresponding author (C.A.R.) was also supported by a Graduate Research Fellowship from NSF, a Predoctoral Fellowship from the Ford Foundation, and a summer fellowship awarded by the MSU Ecology, Evolution, and Behavior program.

## **Author Contributions**

K.R.T., K.E.H., and C.A.R. designed the study, C.A.R. and Mara Hyena Project field assistants collected the samples. C.A.R., S.R.B., and K.R.T. analyzed the data. C.A.R., K.R.T, and K.E.H. wrote the manuscript and all authors approved the final version of the manuscript.

## **Acknowledgements**

We thank the field assistants and graduate students from the Mara Hyena Project for assisting with fecal sample collection in the field. We also thank the Kenya Wildlife Service, the Kenyan National Commission on Science, Technology and Innovation, the Kenyan National Environmental Management Authority, the Narok County Government, the Naboisho Conservancy, the Mara Conservancy, and Brian Heath for allowing us to conduct this research.

641 **Table 1. List of host study species and their associated metadata.**  
642

| Order                  | Family              | Species           | Dietary Guild | Fermenter type | Total Samples (N) | Analyzed samples (N) |
|------------------------|---------------------|-------------------|---------------|----------------|-------------------|----------------------|
| <i>Cetartiodactyla</i> | <i>Bovidae</i>      | African buffalo   | grazer        | foregut        | 18                | 17                   |
| <i>Cetartiodactyla</i> | <i>Bovidae</i>      | Domestic cattle   | grazer        | foregut        | 14                | 13                   |
| <i>Cetartiodactyla</i> | <i>Bovidae</i>      | Common eland      | mixed feeder  | foregut        | 8                 | 8                    |
| <i>Cetartiodactyla</i> | <i>Bovidae</i>      | Impala            | mixed feeder  | foregut        | 20                | 20                   |
| <i>Cetartiodactyla</i> | <i>Bovidae</i>      | Kirk's dik dik    | browser       | foregut        | 37                | 28                   |
| <i>Cetartiodactyla</i> | <i>Bovidae</i>      | Thomson's gazelle | mixed feeder  | foregut        | 14                | 14                   |
| <i>Cetartiodactyla</i> | <i>Bovidae</i>      | Topi              | grazer        | foregut        | 19                | 18                   |
| <i>Cetartiodactyla</i> | <i>Giraffidae</i>   | Masai giraffe     | browser       | foregut        | 25                | 18                   |
| <i>Cetartiodactyla</i> | <i>Suidae</i>       | Warthog           | mixed feeder  | hindgut        | 9                 | 8                    |
| <i>Perissodactyla</i>  | <i>Equidae</i>      | Plains zebra      | grazer        | hindgut        | 5                 | 5                    |
| <i>Proboscidea</i>     | <i>Elephantidae</i> | African elephant  | mixed feeder  | hindgut        | 12                | 12                   |

643  
644  
645  
646  
647

**Table 2. Microbiota richness, evenness, and phylogenetic diversity varies with host family and dietary guild.**

|                                        | Factor                                 | Chao 1 Richness                       | Shannon diversity                    | Phylogenetic diversity              |
|----------------------------------------|----------------------------------------|---------------------------------------|--------------------------------------|-------------------------------------|
| <b>Across study species (N=161)</b>    | Host family                            | $\chi^2=52.86$ ,<br><b>p&lt;0.001</b> | $\chi^2=31.38$<br><b>p&lt;0.001</b>  | $\chi^2=18.65$<br><b>p&lt;0.001</b> |
|                                        | Host dietary guild                     | $\chi^2=79.13$<br><b>p&lt;0.001</b>   | $\chi^2=65.18$<br><b>p&lt;0.001</b>  | $\chi^2=50.67$<br><b>p&lt;0.001</b> |
|                                        | Mean rainfall over prior 2 weeks (mm)  | $\chi^2=1.64$<br>P=0.14               | $\chi^2=0.88$<br>p=0.34              | $\chi^2=2.03$<br>P=0.13             |
|                                        | Mean minimum T over prior 2 weeks (°C) | $\chi^2=2.01$<br>p=0.15               | $\chi^2=2.22$<br>p=0.15              | $\chi^2=4.20$<br><b>p=0.022</b>     |
|                                        | Mean maximum T over prior 2 weeks (°C) | $\chi^2=0.11$<br>p>0.73               | $\chi^2=0.54$<br>p>0.73              | $\chi^2=0.008$<br>p>0.92            |
|                                        | <b>Within bovinds (N=118)</b>          | Host species                          | $\chi^2=59.55$<br><b>p&lt;0.001</b>  | $\chi^2=11.39$<br><b>p=0.02</b>     |
| Host dietary guild                     |                                        | $\chi^2=20.17$<br><b>p&lt;0.0001</b>  | $\chi^2=29.47$<br><b>p&lt;0.0001</b> | $\chi^2=10.25$<br><b>p&lt;0.01</b>  |
| Mean rainfall over prior 2 weeks (mm)  |                                        | $\chi^2=2.94$<br>p=0.08               | $\chi^2=0.53$<br>p=0.46              | $\chi^2=1.96$<br>p=0.16             |
| Mean minimum T over prior 2 weeks (°C) |                                        | $\chi^2=4.62$<br><b>p=0.03</b>        | $\chi^2=1.77$<br>p=0.18              | $\chi^2=4.60$<br><b>p=0.03</b>      |
| Mean maximum T over prior 2 weeks (°C) |                                        | $\chi^2=0.71$<br>p<0.39               | $\chi^2=0.01$<br>p<0.91              | $\chi^2=0.78$<br>p=0.37             |

648  
649 Shown are the Chi-Sq. values and p-values for linear mixed effects models specifying host family, dietary  
650 guild, rainfall, and temperature as a predictor variable, sample month as a random effect, and an alpha-  
651 diversity metric as a dependent variable. Host fermentation type was included in the model, but had no  
652 explanatory power. A similar model restricted to bovinds was also constructed, and specified host species  
653 instead of host family. Significant p-values ( $\alpha=0.05$ ) are bolded.  
654

655 **Table 3. Host family, species, and dietary guild structure the gut microbiota of African**  
 656 **herbivores.**  
 657

| Analysis                                     | Host factors       | Bray-Curtis<br>(% variance explained) | Jaccard<br>(% variance explained) | Weighted Unifrac<br>(% variance explained) | Unweighted Unifrac<br>(% variance explained) |
|----------------------------------------------|--------------------|---------------------------------------|-----------------------------------|--------------------------------------------|----------------------------------------------|
| <b>Across all host study species (N=165)</b> | Host family        | 24.73,<br><b>p=0.001***</b>           | 22.77,<br><b>p=0.001***</b>       | 30.33,<br><b>p=0.001***</b>                | 26.97,<br><b>p=0.001***</b>                  |
|                                              | Host species       | 10.42,<br><b>p=0.001***</b>           | 9.5, <b>p=0.001***</b>            | 5.3, <b>p=0.001***</b>                     | 8.14,<br><b>p=0.001***</b>                   |
|                                              | Host dietary guild | 13.62,<br><b>p=0.001***</b>           | 12.29,<br><b>p=0.001***</b>       | 13.59,<br><b>p=0.001***</b>                | 12.72,<br><b>p=0.001***</b>                  |
|                                              | rainfall (mm)      | 0.4, p>0.05                           | 0.4, p>0.05                       | 0.3, p>0.05                                | 0.3, p>0.05                                  |
|                                              | min T (°C)         | 0.3, p>0.05                           | 0.3, p>0.05                       | 0.2, p>0.05                                | 0.4, p>0.05                                  |
|                                              | max T (°C)         | 0.3, p>0.05                           | 0.3, p>0.05                       | 0.1, p>0.05                                | 0.3, p>0.05                                  |
|                                              | sample month       | 1.6, <b>p&lt;0.01**</b>               | 1.5, <b>p&lt;0.01**</b>           | 1.5, p>0.05                                | 1.5, <b>p&lt;0.05*</b>                       |
| <b>Across bovids (N=122)</b>                 | Host species       | 17.19,<br><b>p=0.001***</b>           | 15.21,<br><b>p=0.001***</b>       | 10.60,<br><b>p=0.001***</b>                | 14.04,<br><b>p=0.001***</b>                  |
|                                              | Host dietary guild | 21.20,<br><b>p=0.001***</b>           | 18.54,<br><b>p=0.001***</b>       | 21.79,<br><b>p=0.001***</b>                | 19.42,<br><b>p=0.001***</b>                  |
|                                              | rainfall (mm)      | 0.5, p>0.05                           | 0.5, p>0.05                       | 0.5, p>0.05                                | 0.5, p>0.05                                  |
|                                              | min T (°C)         | 0.7, p>0.05                           | 0.7, p>0.05                       | 0.5, p>0.05                                | 0.9, p>0.05                                  |
|                                              | max T (°C)         | 0.4, p>0.05                           | 0.5, p>0.05                       | 0.4, p>0.05                                | 0.5, p>0.05                                  |
|                                              | sample month       | 2.6, <b>p&lt;0.01**</b>               | 2.5, <b>p&lt;0.05*</b>            | 1.79, p>0.05                               | 2.6, <b>p&lt;0.05*</b>                       |

658 Shown are the R<sup>2</sup> values (% variance explained) and p-values for PERMANOVA tests based on 4 types of  
 659 distance matrices. Bray-Curtis and Weighted Unifrac distance matrices take into consideration the  
 660 proportions of bacterial taxa, while Jaccard and unweighte Unifrac take into account their presence or  
 661 absence. Both Unifrac distances account for phylogenetic relatedness among bacterial types. \*p<0.05  
 662 \*\*p<0.01 \*\*\*p=0.001. Significant p-values (α=0.05) are bolded.  
 663  
 664  
 665  
 666  
 667  
 668  
 669  
 670  
 671  
 672  
 673  
 674  
 675  
 676  
 677  
 678  
 679  
 680  
 681



682 **Figures and legends**

683 **Figure 1. Gut microbiota composition of African herbivores.** **A)** Stacked bar plots showing the  
 684 relative frequency of 16S rRNA gene sequences assigned to each bacterial family (or order, if a  
 685 family-level classification could not be assigned) across samples. Samples are grouped by host  
 686 species, and each color represents a bacterial family. **B)** Bacterial families enriched in the guts of  
 687 hosts from different families as determined by indicator species analysis. Differences in these taxa  
 688 abundances can explain differences among the microbiota of different groups. **C)** Bacterial families  
 689 enriched in the guts of hosts from different dietary guilds as determined by indicator species  
 690 analysis.

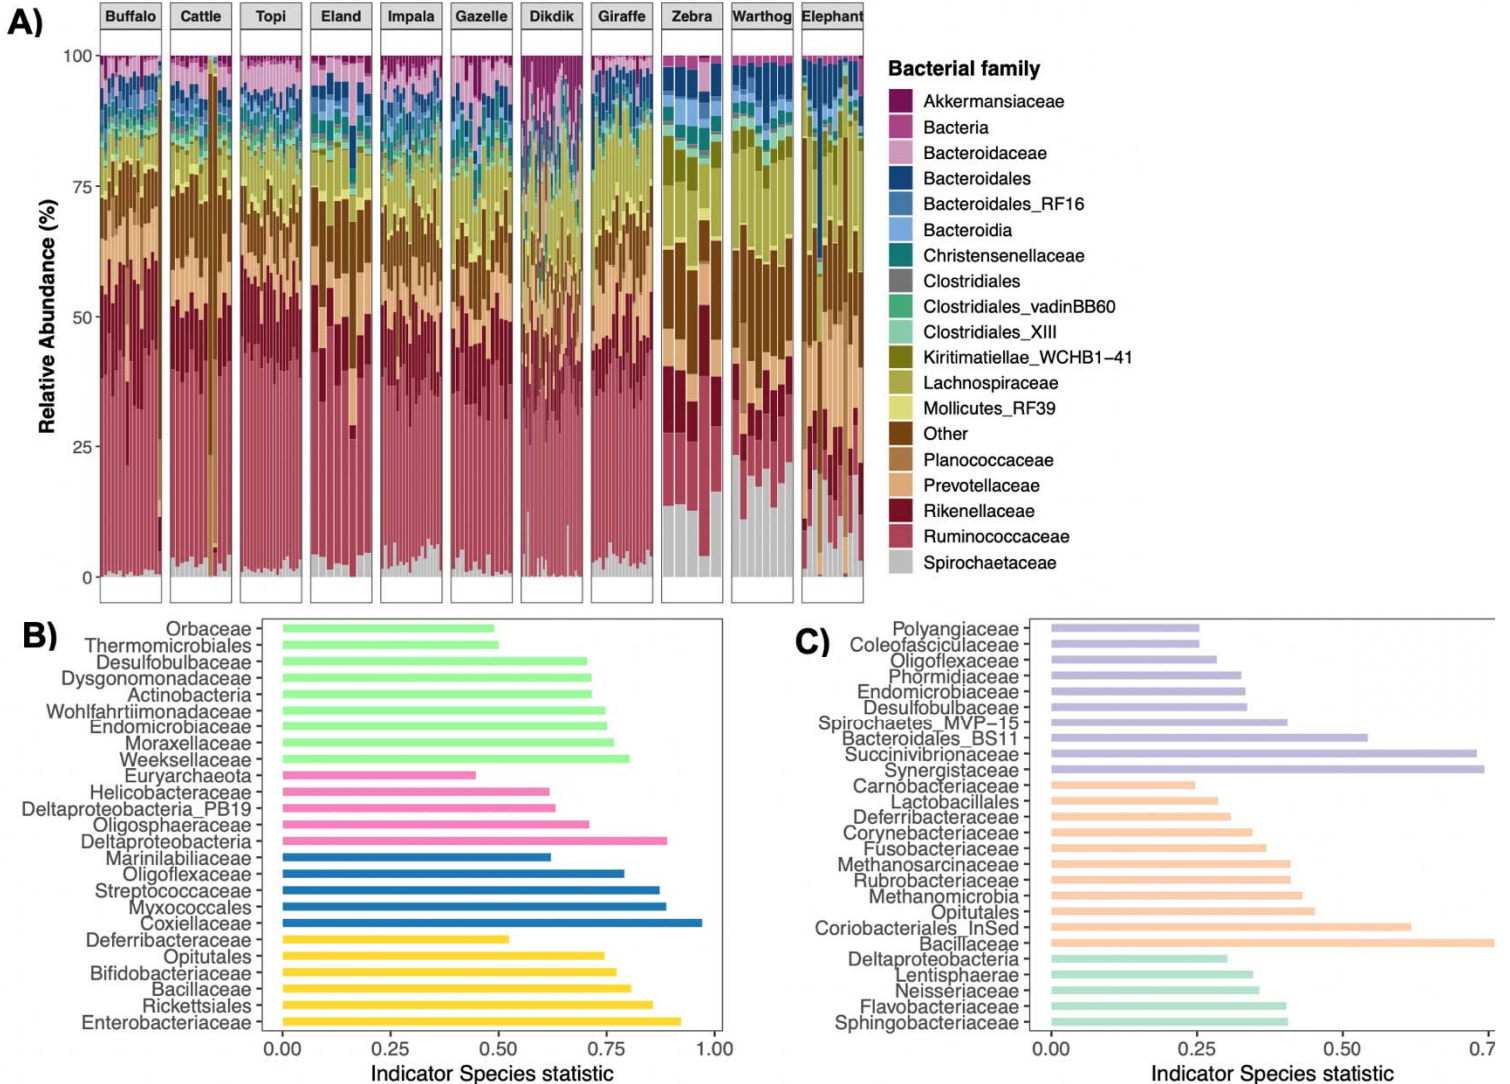

691

692 **Figure 2. Host phylogenetic relatedness and dietary guild drive gut microbiota diversity and**  
 693 **structure in African herbivores. A)** Boxplots of microbiota evenness (Shannon diversity) among  
 694 host families (left) and dietary guilds (right). Thicker dots represent outlier values. **B)** PCoA plots  
 695 constructed from Bray-Curtis dissimilarity matrices. Each point represents a sample and is color-  
 696 coded by host family (left) or host dietary guild (right). Closeness of points indicates high  
 697 community similarity. The percentage of variance accounted for by each principal-coordinate axis is  
 698 shown in the axis labels. **C)** Boxplots of microbiota evenness (Shannon diversity) among host  
 699 species (left) and dietary guilds (right) within the family *Bovidae*. **D)** PCoA plots constructed from  
 700 Bray-Curtis dissimilarity matrices of bovid species only. Each point is color-coded by host species  
 701 (left) or host dietary guild (right).

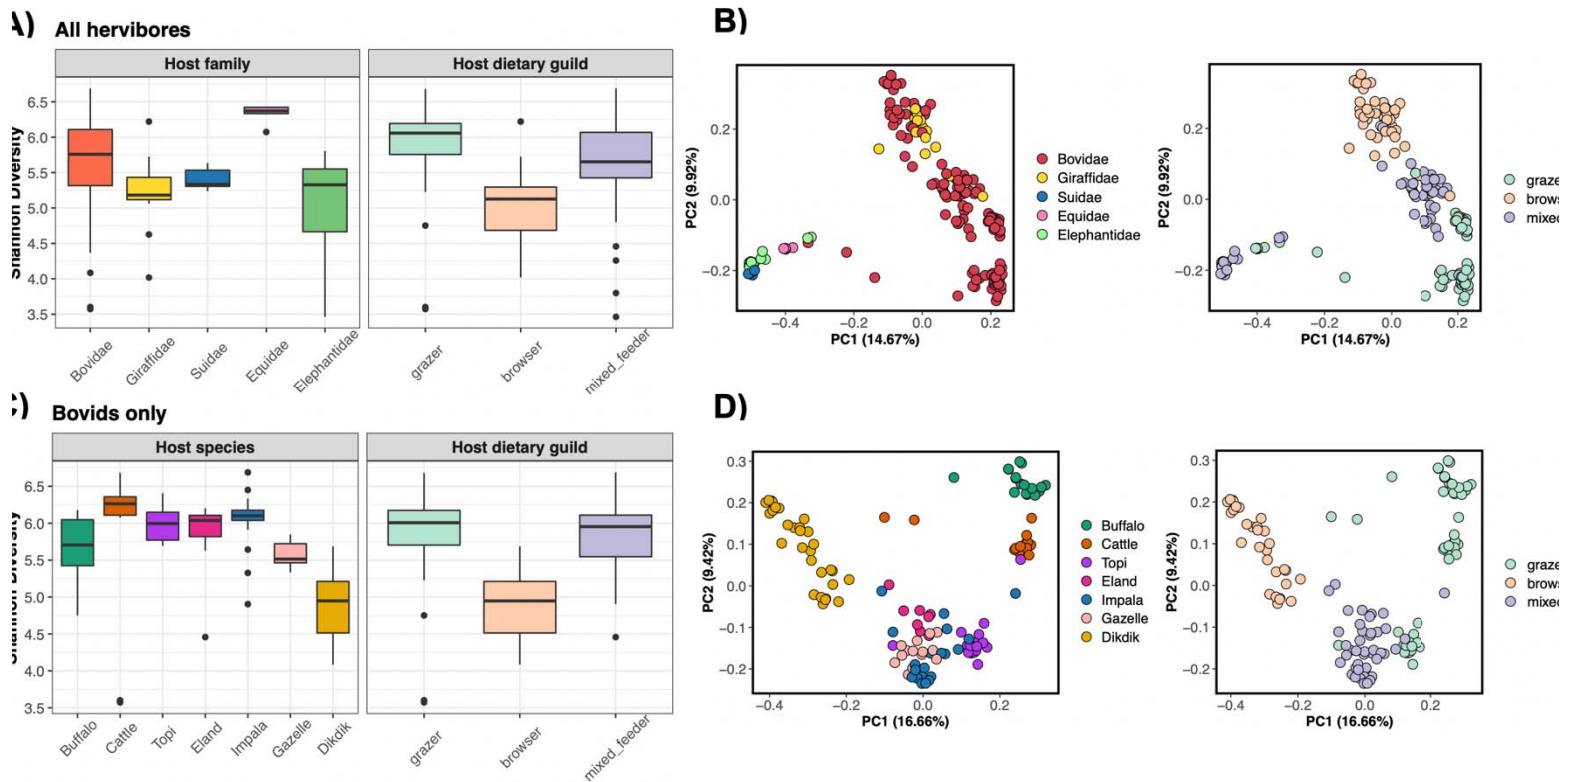

702  
 703  
 704  
 705  
 706  
 707  
 708  
 709  
 710  
 711  
 712  
 713  
 714  
 715

716 **Figure 3. African herbivores exhibit patterns of phyllosymbiosis.** A) phylogenetic tree of host  
717 species obtained by pruning Upham's *et al.* 2019 Mammalian supertree. B) Plotted are pairwise  
718 host divergence times (in millions of years) vs. gut microbiota similarity (Bray-Curtis distances)  
719 across all sampled herbivores (left) and within the single host family *Bovidae* (right). A strong  
720 correlation is observed among the sampled herbivores ( $r=0.73$ ,  $p<0.05$ ), yet not within the family  
721 *Bovidae* ( $r=0.21$ , NS).  
722

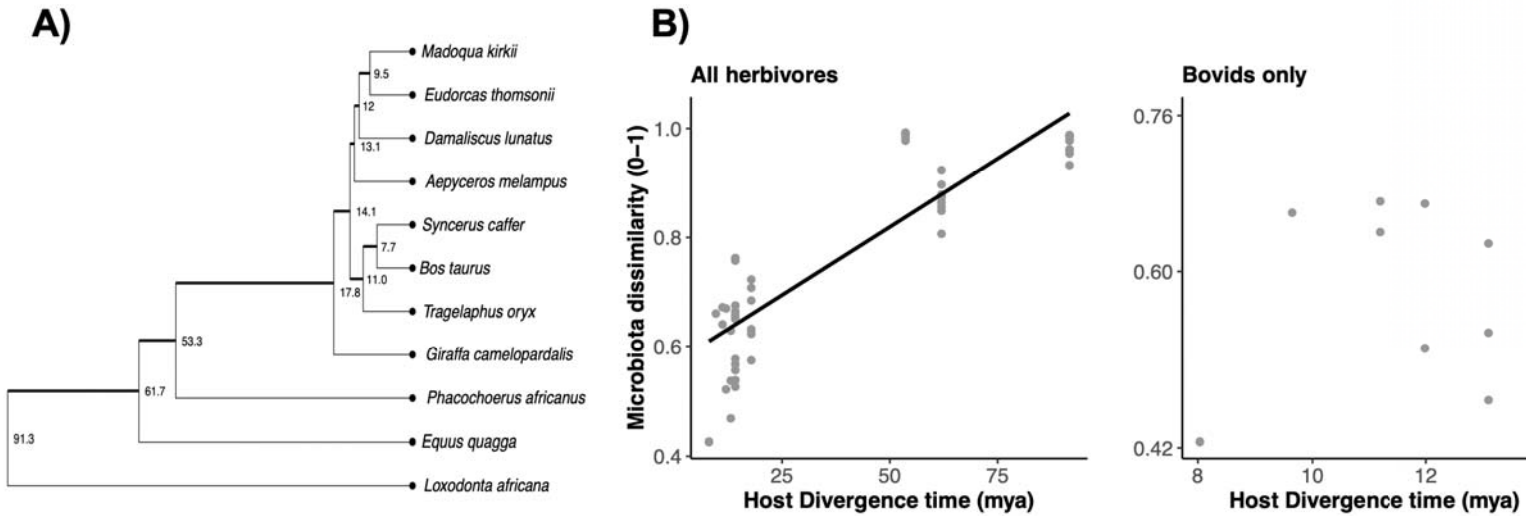

723  
724  
725  
726  
727  
728  
729  
730  
731  
732  
733  
734  
735  
736  
737  
738  
739  
740  
741  
742  
743  
744  
745

746 **Figure 4. Gut microbiotas of African herbivores are not shaped by host geography.** We  
 747 compared the gut microbiotas of eight species of herbivores residing in both the Masai Mara (this  
 748 study) and Laikipia (Kartzinel *et al.* 2019) regions in Kenya. **A)** PCoA plots constructed from Bray-  
 749 Curtis dissimilarity matrices. Each point represents a sample and is color-coded by host species.  
 750 The shapes represent the geographic region. Closeness of points indicates high community  
 751 similarity. The percentage of variance accounted for by each principal-coordinate axis is shown in  
 752 the axis labels. For PERMANOVA analyses, see Table S3. **B)** Top 32 most abundant bacterial ASVs  
 753 inhabiting the guts of Masai Mara and Laikipia herbivores. Heatmap showing the relative  
 754 abundances (proportions) of these top ASVs in eight species of herbivores. Samples are grouped by  
 755 host species and color-coded by host geographic region.

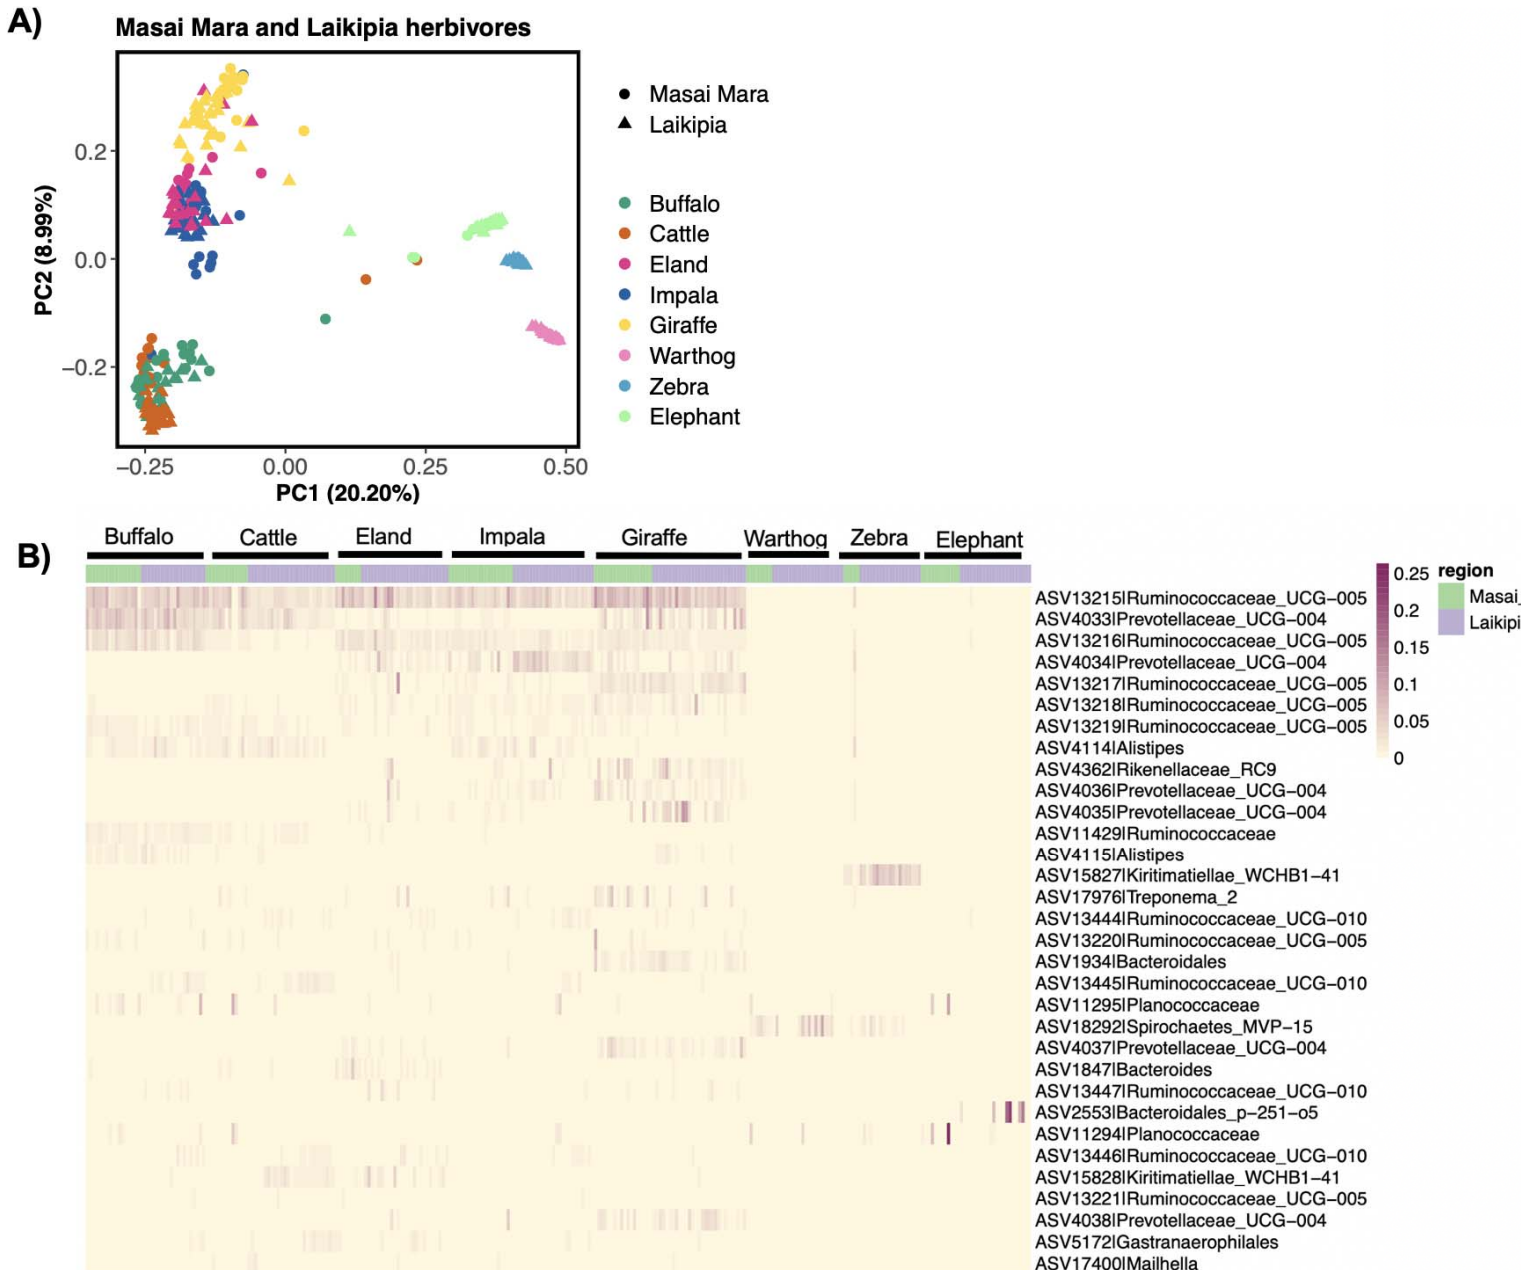

756

757 **Additional files**

758 **Additional file 1. Tables S1-S3. Table S1:** Multiple-comparison testing of gut microbiota alpha-  
759 diversity among host families. **Table S2:** Multiple-comparison testing of gut microbiota alpha-  
760 diversity among host species in bovids. **Table S3:** PERMANOVA tests that included host species,  
761 geographic region, and dietary guild (Masai Mara and Laikipia herbivores). (.xlsx 17 KB).  
762

763 **Additional file 2. Figures S1-S4. Figure S1:** Rarefaction curves of ASV richness. **Figure S2:**  
764 Stacked bar plots showing relative abundances of top bacterial phyla. **Figure S3:** Stacked bar plots  
765 showing relative abundances of top bacterial genera. **Figure S4:** PCoA ordinations showing sample  
766 clustering within each dietary guild (grazers, browsers, mixed-feeders). (.pdf 8.83 KB).  
767

768  
769  
770  
771  
772  
773  
774  
775  
776  
777  
778  
779  
780  
781  
782  
783  
784  
785  
786  
787  
788  
789  
790  
791  
792  
793  
794  
795  
796  
797  
798  
799  
800  
801  
802

## 803 **References**

- 804 1. Jovel J, Dieleman LA, Kao D, Mason AL, Wine E. The Human Gut Microbiome in Health and  
805 Disease. *Metagenomics*. 2018;:197–213. doi:10.1016/B978-0-08-102268-9.00010-0.
- 806 2. Ungerfeld E, Leigh M, Forster R, Barboza P. Influence of Season and Diet on Fiber  
807 Digestion and Bacterial Community Structure in the Rumen of Muskoxen (*Ovibos*  
808 *moschatus*). *Microorganisms*. 2018;6:89. doi:10.3390/microorganisms6030089.
- 809 3. Greene LK, McKenney EA, O'Connell TM, Drea CM. The critical role of dietary foliage in  
810 maintaining the gut microbiome and metabolome of folivorous sifakas. *Sci Rep*. 2018;8:1–  
811 13.
- 812 4. den Besten G, van Eunen K, Groen A, Venema K, Reijngoud D, Bakker B. The role of short-  
813 chain fatty acids in the between diet, gut microbiota, and host energy metabolism. *J Lipid*  
814 *Res*. 2013;54:2325–40. doi:10.1194/jlr.R036012.
- 815 5. Park W. Gut microbiomes and their metabolites shape human and animal health. *J*  
816 *Microbiol*. 2018;56:151–3. doi:10.1007/s12275-018-0577-8.
- 817 6. Münger E, Montiel-Castro AJ, Langhans W, Pacheco-López G. Reciprocal Interactions  
818 Between Gut Microbiota and Host Social Behavior. *Front Integr Neurosci*. 2018;12:1–14.  
819 doi:10.3389/fnint.2018.00021.
- 820 7. Pennisi E. Gut bacteria linked to mental well-being and depression. *Science (80-)*.  
821 2019;363:569–569. doi:10.1126/science.363.6427.569.
- 822 8. Bennett G, Malone M, Sauter ML, Cuzzo FP, White B, Nelson KE, et al. Host age, social  
823 group, and habitat type influence the gut microbiota of wild ring-tailed lemurs (*Lemur*  
824 *catta*). *Am J Primatol*. 2016;78:883–92.
- 825 9. Lim MY, Song EJ, Kang KS, Nam Y. Age-related compositional and functional changes in  
826 micro-pig gut microbiome. *GeroScience*. 2019;41:935–44.
- 827 10. Liu X, Fan P, Yi L, Zhao N, Garber PA. Fecal bacterial diversity of wild Sichuan snub-  
828 nosed monkeys (*Rhinopithecus roxellana*). *Am J Primatol*. 2018;80:1–9.
- 829 11. Menke S, Meier M, Mfuno JKE, Melzheimer J, Wachter B, Sommer S. Effects of host traits  
830 and land-use changes on the gut microbiota of the Namibian black-backed jackal (*Canis*  
831 *mesomelas*). *FEMS Microbiol Ecol*. 2017;93:1–16.
- 832 12. Watson SE, Hauffe HC, Bull M, McKinney MA, Atwood TA, Perkins SE. Global change-  
833 driven use of onshore habitat impacts polar bear faecal microbiota. *ISME J*. 2019.  
834 doi:10.1038/s41396-019-0480-2.
- 835 13. Angelakis E, Yasir M, Bachar D, Azhar EI, Lagier JC, Bibi F, et al. Gut microbiome and  
836 dietary patterns in different Saudi populations and monkeys. *Sci Rep*. 2016;6:1–9.  
837 doi:10.1038/srep32191.
- 838 14. Goertz S, Menezes AB De, Birtles RJ, Id JF, Lowe E, Maccoll ADC, et al. Geographical  
839 location influences the composition of the gut microbiota in wild house mice (*Mus*  
840 *musculus domesticus*) at a fine spatial scale. *PLoS One*. 2019;14:1–16.
- 841 15. Orkin JD, Campos FA, Guadamuz A, Melin AD, Myers MS, Hernandez SEC. Seasonality of  
842 the gut microbiota of free-ranging white-faced capuchins in a tropical dry forest. *ISME J*.  
843 2019;13:183–196. doi:10.1038/s41396-018-0256-0.
- 844 16. Groussin M, Mazel F, Sanders JG, Smillie CS, Lavergne S, Thuiller W, et al. Unraveling the  
845 processes shaping mammalian gut microbiomes over evolutionary time. *Nat Commun*.  
846 2017;8:14319. doi:10.1038/ncomms14319.
- 847 17. Muegge BD, Kuczynski J, Kinghts D, Clemente JC, Fontana L, Henrissat B, et al. Diet  
848 drives Convergence in Gut Microbiome Functions Across Mammalian Phylogeny and

- 849 Within Humans. *Science* (80- ). 2017;332:970–4.
- 850 18. Ley RE, Hamady M, Lozupone C, Turnbaugh PJ, Ramey RR, Bircher JS, et al. Evolution of  
851 Mammals and Their Gut Microbes. *Science* (80- ). 2008;320:1647.
- 852 19. Gomez A, Rothman JM, Petrzekova K, Yeoman CJ, Vlckova K, Umaña JD, et al. Temporal  
853 variation selects for diet–microbe co-metabolic traits in the gut of Gorilla spp. *ISME J*.  
854 2016;10:514–26. doi:10.1038/ismej.2015.146.
- 855 20. Wu Q, Wang X, Ding Y, Hu Y, Nie Y, Wei W, et al. Seasonal variation in nutrient  
856 utilization shapes gut microbiome structure and function in wild giant pandas. *Proc R Soc B*  
857 *Biol Sci*. 2017;284:20170955.
- 858 21. Jin L, Wu D, Li C, Zhang A, Xiong Y, Wei R, et al. Bamboo nutrients and microbiome affect  
859 gut microbiome of giant panda. *Symbio*. 2020;80:293–304.
- 860 22. Li J, Zhan S, Liu X, Lin Q, Jiang J, Li X. Divergence of Fecal Microbiota and Their  
861 Associations With Host Phylogeny in Cervinae. *Front Microbiol*. 2018;9:1–11.  
862 doi:10.3389/fmicb.2018.01823.
- 863 23. Amato KR, Sanders J, Song SJ, Nute M, Metcalf JL, Thompson LR, et al. Evolutionary  
864 trends in host physiology outweigh dietary niche in structuring primate gut microbiomes.  
865 *ISME J*. 2019;13:576–587. doi:10.1038/s41396-018-0175-0.
- 866 24. Nishida AH, Ochman H. Rates of gut microbiome divergence in mammals. *Mol Ecol*.  
867 2018;27:1884–97.
- 868 25. Youngblut ND, Reischer GH, Walters W, Schuster N, Walzer C, Stalder G, et al. Host diet  
869 and evolutionary history explain different aspects of gut microbiome diversity among  
870 vertebrate clades. *Nat Commun*. 2019;10:1–15. doi:10.1038/s41467-019-10191-3.
- 871 26. Moeller AH, Suzuki TA, Lin D, Lacey EA, Wasser SK, Nachman MW. Dispersal limitation  
872 promotes the diversification of the mammalian gut microbiota. *PNAS*. 2017;114:13768–73.  
873 doi:10.1073/pnas.1700122114.
- 874 27. Kohl KD. Ecological and evolutionary mechanisms underlying patterns of  
875 phyllosymbiosis in host-associated microbial communities. *Philos Trans R Soc B Biol Sci*.  
876 2020;375.
- 877 28. Lim SJ, Bordenstein SR. An introduction to phyllosymbiosis. *Proc R Soc B Biol Sci*.  
878 2020;287.
- 879 29. Brooks AW, Kohl KD, Brucker RM, Van Opstal EJ, Bordenstein SR. Phyllosymbiosis:  
880 Relationships and Functional Effects of Microbial Communities across Host Evolutionary  
881 History. *PLoS Biol*. 2016;14:1–19. doi:10.1371/journal.pbio.2000225.
- 882 30. Knowles SCL, Eccles RM, Baltrūnaitė L. Species identity dominates over environment in  
883 shaping the microbiota of small mammals. *Ecol Lett*. 2019;22:826–37.
- 884 31. Kohl KD, Varner J, Wilkening JL, Dearing MD. Gut microbial communities of American  
885 pikas (*Ochotona princeps*): Evidence for phyllosymbiosis and adaptations to novel diets. *J*  
886 *Anim Ecol*. 2018;87:323–30.
- 887 32. Kartzinel TR, Hsing JC, Musili PM, Brown BRP, Pringle RM. Covariation of diet and gut  
888 microbiome in African megafauna. *PNAS*. 2019;116:1–6.
- 889 33. Ottichilo WK, De Leeuw J, Skidmore AK, Prins HHT, Said MY. Population trends of large  
890 non-migratory wild herbivores and livestock in the Masai Mara ecosystem, Kenya, between  
891 1977 and 1997. *Afr J Ecol*. 2000;38:202–16.
- 892 34. Goheen JR, Augustine DJ, Veblen KE, Kimuyu DM, Palmer TM, Porensky LM, et al.  
893 Conservation lessons from large-mammal manipulations in East African savannas: The  
894 KLEE, UHURU, and GLADE experiments. *Ann N Y Acad Sci*. 2018;1429:31–49.

- 895 35. Veldhuis MP, Ritchie ME, Ogutu JO, Morrison TA, Beale CM, Estes AB, et al. Cross-  
896 boundary human impacts compromise the Serengeti-Mara ecosystem. *Science* (80- ).  
897 2019;363:1424–8. doi:10.1126/science.aav0564.
- 898 36. Augustine DJ. Response of native ungulates to drought in semi-arid Kenyan rangeland.  
899 *Afr J Ecol.* 2010;48:1009–20.
- 900 37. Broten MD, Said M. Population Trends of Ungulates in and around Kenya’s Masai Mara  
901 Reserve. In: *Serengeti II: Dynamics, Management, and Conservation of an Ecosystem.* 1995.  
902 p. 169–93.
- 903 38. Scheelings TF, Moore RJ, Van TTH, Klaassen M, Reina RD. Microbial symbiosis and  
904 coevolution of an entire clade of ancient vertebrates: the gut microbiota of sea turtles and  
905 its relationship to their phylogenetic history. *Anim Microbiome.* 2020;2:2–12.
- 906 39. Tinker KA, Ottesen EA. Phyllosymbiosis across deeply diverging lineages in omnivorous  
907 cockroaches. *Appl Environ Microbiol.* 2020;86:e02513-19. doi:10.1128/AEM.02513-19.
- 908 40. Schmidt E, Mykytczuk N, Schulte-Hostedde AI. Effects of the captive and wild  
909 environment on diversity of the gut microbiome of deer mice (*Peromyscus maniculatus*).  
910 *ISME J.* 2019;13:1293–305. doi:10.1038/s41396-019-0345-8.
- 911 41. Perofsky AC, Lewis RJ, Meyers LA. Terrestriality and bacterial transfer: a comparative  
912 study of gut microbiomes in sympatric Malagasy mammals. *ISME J.* 2019;13:50–63.  
913 doi:10.1038/s41396-018-0251-5.
- 914 42. Greene LK, Clayton JB, Rothman RS, Semel BP, Semel MA, Gillespie TR, et al. Local  
915 habitat, not phylogenetic relatedness, predicts gut microbiota better within folivorous  
916 than frugivorous lemur lineages. *Biol Lett.* 2019;15:5–11.
- 917 43. Gogarten JF, Davies TJ, Benjamino J, Gogarten JP, Graf J, Mielke A, et al. Factors  
918 influencing bacterial microbiome composition in a wild non-human primate community in  
919 Taï National Park, Côte d’Ivoire. *ISME J.* 2018;12:2559–74. doi:10.1038/s41396-018-0166-  
920 1.
- 921 44. Amato KR, Mallott EK, McDonald D, Dominy NJ, Goldberg T, Lambert JE, et al.  
922 Convergence of human and Old World monkey gut microbiomes demonstrates the  
923 importance of human ecology over phylogeny. *Genome Biol.* 2019;20:201.
- 924 45. Groussin M, Mazel F, Alm EJ. Co-evolution and Co-speciation of Host-Gut Bacteria  
925 Systems. *Cell Host Microbe.* 2020;28:12–22. doi:10.1016/j.chom.2020.06.013.
- 926 46. Gerardo NM, Hoang KL, Stoy KS. Evolution of animal Immunity in the light of beneficial  
927 symbioses. *Philos Trans R Soc B2.* 2020;375:20190601.
- 928 47. Popkes M, Valenzano DR. Microbiota-host interactions shape ageing dynamics. *Philos*  
929 *Trans R Soc B2.* 2020;375:20190596.
- 930 48. Godon JJ, Arulazhagan P, Steyer JP, Hamelin J. Vertebrate bacterial gut diversity: Size  
931 also matters. *BMC Ecol.* 2016;16:1–9.
- 932 49. Liu P, Cheng A, Huang S, Lu H, Oshida T. Body-size Scaling is Related to Gut Microbial  
933 Diversity, Metabolism and Dietary Niche of Arboreal Folivorous Flying Squirrels. *Sci Rep.*  
934 2020;:1–12. doi:10.1038/s41598-020-64801-y.
- 935 50. Moeller AH, Sanders JG. Roles of the gut microbiota in the adaptive evolution of  
936 mammalian species. *Philos Trans R Soc B2.* 2020;375:20190597.
- 937 51. Kolodny O, Schulenburg H. Microbiome-mediated plasticity directs host evolution along  
938 several distinct time-scales. *Philos Trans R Soc B2.* 2020;375:20190589.
- 939 52. Grond K, Bell KC, Demboski JR, Santos M, Sullivan JM, Hird SM. No evidence for  
940 phyllosymbiosis in western chipmunk species. *FEMS Microbiol Ecol.* 2020;96:1–10.



- 941 53. Grieneisen LE, Charpentier MJE, Alberts SC, Blekhman R, Bradburd G, Tung J, et al.  
942 Genes, geology and germs: Gut microbiota across a primate hybrid zone are explained by  
943 site soil properties, not host species. *Proc R Soc B Biol Sci.* 2019;286.
- 944 54. Clemens ET, Maloiy GMO. Digestive physiology of East African wild ruminants. *Comp*  
945 *Biochem Physiol -- Part A Physiol.* 1983;76:319–33.
- 946 55. Illius AW, Gordon IJ. The functional significance of the browser-grazer dichotomy in  
947 African ruminants. *Oecologia.* 1994;98:167–75.
- 948 56. Pérez-Barbería JF, Gordon IJ, Illius AW. Phylogenetic analysis of stomach adaptation in  
949 digestive strategies in African ruminants. *Oecologia.* 2001;129:498–508.
- 950 57. Budd K, Gunn JC, Eggert LS, Finch T, Klymus K, Sitati N. Effects of diet, habitat, and  
951 phylogeny on the fecal microbiome of wild African savanna (*Loxodonta africana*) and  
952 forest elephants (*L. cyclotis*). *Ecol Evol.* 2020; April:1–14.
- 953 58. Metcalf JL, Song SJ, Morton JT, Weiss S, Seguin-Orlando A, Joly F, et al. Evaluating the  
954 impact of domestication and captivity on the horse gut microbiome. *Sci Rep.* 2017;7.
- 955 59. Miler et al. Ovarian cycling and reproductive state shape the vaginal microbiota in wild  
956 baboons. *Microbiome.* 2017;5.
- 957 60. Moeller AHA, Foerster S, Wilson ML, Pusey AE, Hahn BH, Ochman H. Social behavior  
958 shapes the chimpanzee pan-microbiome. *Sci Adv.* 2016;2:e1500997–e1500997.  
959 doi:10.1126/sciadv.1500997.
- 960 61. Johnson KVA. Gut microbiome composition and diversity are related to human  
961 personality traits. *Hum Microbiome J.* 2020;15 December 2019:100069.  
962 doi:10.1016/j.humic.2019.100069.
- 963 62. Gwynne M, Bell R. Selection of Vegetation Components by Grazing Ungulates in the  
964 Serengeti National Park. *Nature.* 1968;220:390–3.
- 965 63. Henderson G, Cox F, Ganesh S, Jonker A, Young W, Janssen PH, et al. Rumen microbial  
966 community composition varies with diet and host, but a core microbiome is found across a  
967 wide geographical range. *Sci Rep.* 2015;5:14567.
- 968 64. Edwards JE, Shetty SA, Berg P Van Den, Burden F, Doorn DA Van, Pellikaan WF, et al.  
969 Multi-kingdom characterization of the core equine fecal microbiota based on multiple  
970 equine (sub) species. *Anim Microbiome.* 2020;2:1–16.
- 971 65. Ilmberger N, Güllert S, Dannenberg J, Rabausch U, Torres J, Wemheuer B, et al. A  
972 comparative metagenome survey of the fecal microbiota of a breast-and a plant-fed asian  
973 elephant reveals an unexpectedly high diversity of glycoside hydrolase family enzymes.  
974 *PLoS One.* 2014;9:1–12.
- 975 66. Roggenbuck M, Sauer C, Poulsen M, Bertelsen MF, Sørensen SJ. The giraffe (*Giraffa*  
976 *camelopardalis*) rumen microbiome. *FEMS Microbiol Ecol.* 2014;90:237–46.
- 977 67. Tan SC, Chong CW, Yap IKS, Thong KL, Teh CSJ. Comparative assessment of faecal  
978 microbial composition and metabonome of swine, farmers and human control. *Sci Rep.*  
979 2020;10:1–13.
- 980 68. Zeng B, Zhang S, Xu H, Kong F, Yu X, Wang P, et al. Gut microbiota of Tibetans and  
981 Tibetan pigs varies between high and low altitude environments. *Microbiol Res.* 2020;235  
982 November 2019:126447. doi:10.1016/j.micres.2020.126447.
- 983 69. Biddle A, Stewart L, Blanchard J, Leschine S. Untangling the genetic basis of fibrolytic  
984 specialization by Lachnospiraceae and Ruminococcaceae in diverse gut communities.  
985 *Diversity.* 2013;5.
- 986 70. Flint HJ, Scott KP, Duncan SH, Louis P, Forano E. Microbial degradation of complex

- 987 carbohydrates in the gut. *Gut Microbes*. 2012; August:289–306.
- 988 71. Kohl KD, Denise Dearing M. The woodrat gut microbiota as an experimental system for  
989 understanding microbial metabolism of dietary toxins. *Front Microbiol*. 2016;7:1–9.
- 990 72. Morris BEL, Henneberger R, Huber H, Moissl-Eichinger C. Microbial syntrophy:  
991 Interaction for the common good. *FEMS Microbiology Reviews*. 2013;37:384–406.
- 992 73. McLaren MR, Callahan BJ. Pathogen resistance may be the principal evolutionary  
993 advantage provided by the microbiome. *Philos Trans R Soc B2*. 2020;375:20190592.
- 994 74. Garcia-Gutierrez E, Mayer MJ, Cotter PD, Narbad A. Gut microbiota as a source of novel  
995 antimicrobials. *Gut Microbes*. 2019;10:1–21. doi:10.1080/19490976.2018.1455790.
- 996 75. Pringle RM, Goheen JR, Palmer TM, Charles GK, DeFranco E, Hohbein R, et al. Low  
997 functional redundancy among mammalian browsers in regulating an encroaching shrub  
998 (*Solanum campylacanthum*) in African savannah. *Proc R Soc B Biol Sci*. 2014;281.
- 999 76. Kingdon J. *East African Mammals: Volume I*. Chicago: The University of Chicago Press;  
1000 1984.
- 1001 77. Kingdon J. *East African Mammals: Volume IIIC*. Chicago: The University of Chicago  
1002 Press; 1982.
- 1003 78. Kingdon J. *East African Mammals: Volume IIID*. Chicago: The University of Chicago  
1004 Press; 1982.
- 1005 79. Kingdon J. *East African Mammals: Volume IIIB*. Chicago: The University of Chicago  
1006 Press; 1979.
- 1007 80. Caporaso JG, Lauber CL, Walters WA, Berg-Lyons D, Huntley J, Fierer N, et al. Ultra-high-  
1008 throughput microbial community analysis on the Illumina HiSeq and MiSeq platforms.  
1009 *ISME J*. 2012;6:1621–4. doi:10.1038/ismej.2012.8.
- 1010 81. Kozich JJ, Westcott SL, Baxter NT, Highlander SK, Schloss PD. Development of a Dual-  
1011 Index Sequencing Strategy and Curation Pipeline for Analyzing Amplicon Sequence Data on  
1012 the MiSeq Illumina Sequencing Platform. *Appl Environ Microbiol*. 2013;79:5112–20.  
1013 doi:10.1128/AEM.01043-13.
- 1014 82. R Core Team. R: a language and environment for statistical computing. In: R Foundation  
1015 for Statistical Computing. Vienna, Austria; 2019. [https://www.gbif.org/tool/81287/r-a-](https://www.gbif.org/tool/81287/r-a-language-and-environment-for-statistical-computing)  
1016 [language-and-environment-for-statistical-computing](https://www.gbif.org/tool/81287/r-a-language-and-environment-for-statistical-computing). Accessed 28 Aug 2019.
- 1017 83. Callahan BJ, McMurdie PJ, Rosen MJ, Han AW, Johnson AJA, Holmes SP. DADA2: High-  
1018 resolution sample inference from Illumina amplicon data. *Nat Methods*. 2016;13:581–3.
- 1019 84. Quast C, Pruesse E, Yilmaz P, Gerken J, Schweer T, Yarza P, et al. The SILVA ribosomal  
1020 RNA gene database project: improved data processing and web-based tools. *Nucleic Acids*  
1021 *Res*. 2013;41:D590-6. doi:10.1093/nar/gks1219.
- 1022 85. Wickham H. *ggplot2: Elegant Graphics for Data Analysis*. New York, NY: Springer-Verlag  
1023 New York; 2009. doi:10.1007/978-0-387-98141-3.
- 1024 86. Schloss PD, Westcott SL, Ryabin T, Hall JR, Hartmann M, Hollister EB, et al. Introducing  
1025 mothur: open-source, platform-independent, community-supported software for  
1026 describing and comparing microbial communities. *Appl Environ Microbiol*. 2009;75:7537–  
1027 41. doi:10.1128/AEM.01541-09.
- 1028 87. Bo T-B, Zhang X-Y, Wen J, Deng K, Qin X-W, Wang D-H. The microbiota-gut-brain  
1029 interaction in regulating host metabolic adaptation to cold in male Brandt’s voles  
1030 (*Lasiopodomys brandtii*). *ISME J*. 2019. doi:10.1038/s41396-019-0492-y.
- 1031 88. McMurdie PJ, Holmes S. Phyloseq: An R Package for Reproducible Interactive Analysis  
1032 and Graphics of Microbiome Census Data. *PLoS One*. 2013;8:1–11.

- 1033 89. Schliep KP. phangorn: Phylogenetic analysis in R. *Bioinformatics*. 2011;27:592–3.  
1034 90. Kembel SW, Cowan PD, Helmus MR, Cornwell WK, Morlon H, Ackerly DD, et al. Picante:  
1035 R tools for integrating phylogenies and ecology. *Bioinformatics*. 2010;26:1463–4.  
1036 91. Bates D, Mächler M, Bolker B, Walker S. Fitting Linear Mixed-Effects Models Using lme4.  
1037 *J Stat Softw*. 2015;67:1–48. doi:10.18637/jss.v067.i01.  
1038 92. Fox J, Weisberg S, Fox J. *An R companion to applied regression*. Thousand Oaks, CA:  
1039 Sage; 2011.  
1040 93. Oksanen J, Blanchet F, Friendly M, Kindt R, Legendre P, McGlinn D, et al. vegan:  
1041 Community Ecology Package. R Packag version 2.4-6. 2018. [https://cran.r-](https://cran.r-project.org/web/packages/vegan/index.html)  
1042 [project.org/web/packages/vegan/index.html](https://cran.r-project.org/web/packages/vegan/index.html). Accessed 28 Aug 2019.  
1043 94. Upham N, Esselstyn J, Jetz W. Inferring the mammal tree: species-level sets of  
1044 phylogenies for questions in ecology, evolution, and conservation. *PLoS Biol*.  
1045 2019;17:e3000494.  
1046 95. Paradis E, Claude J, Strimmer K. APE: Analyses of phylogenetics and evolution in R  
1047 language. *Bioinformatics*. 2004;20:289–90.  
1048 96. De Cáceres M, Legendre P. Associations between species and groups of sites: Indices  
1049 and statistical inference. *Ecology*. 2009;90:3566–74.  
1050 97. Kolde R. Pheatmap: Pretty Heatmaps. R package version 1.0.12. 2019;;1–8.  
1051 <https://cran.r-project.org/package=pheatmap>.  
1052
